# Supplementary material
Source: publisher figshare collection journal article supplement (https://acs.figshare.com/ndownloader/files/24789216)
Supplement: Supplementary file 1 [file 24789216]

# Supporting Information

## Optoelectronic Properties of a van der Waals WS<sub>2</sub> Monolayer/2D Perovskite Vertical Heterostructure

*Qixing Wang<sup>†,‡,¶</sup>, Qi Zhang<sup>†,¶</sup>, Xin Luo<sup>§,¶</sup>, Junyong Wang<sup>†</sup>, Rui Zhu<sup>†</sup>, Qijie Liang<sup>†,//</sup>, Lei Zhang<sup>†</sup>,*

*Justin Zhou Yong<sup>†</sup>, Calvin Pei Yu Wong<sup>⊥</sup>, Goki Eda<sup>†, #, ▽</sup>, Jurgen H. Smet<sup>‡</sup>, and Andrew T. S.*

*Wee<sup>\*†, #</sup>*

<sup>†</sup>Department of Physics, National University of Singapore, 2 Science Drive 3, Singapore 117542,  
Singapore

<sup>‡</sup>Max Planck Institute for Solid State Research, Stuttgart D-70569, Germany (current position)

<sup>§</sup>State Key Laboratory of Optoelectronic Materials and Technologies, Centre for Physical  
Mechanics and Biophysics, School of Physics, Sun Yat-sen University, Guangzhou 510275, P.R.  
China

<sup>//</sup>SZU-NUS Collaborative Innovation Center for Optoelectronic Science & Technology, Key  
Laboratory of Optoelectronic Devices and Systems of Ministry of Education and Guangdong  
Province, College of Optoelectronic Engineering, Shenzhen University, Shenzhen 518060, China

<sup>⊥</sup>Institute of Materials Research and Engineering (IMRE), Agency for Science, Technology and  
Research (A\*STAR), 2 Fusionopolis Way, Innovis #08-03, Singapore 138634, Singapore

<sup>#</sup>Centre for Advanced 2D Materials, National University of Singapore, Block S14, 6 Science Drive 2, Singapore 117546, Singapore

<sup>∇</sup>Department of Chemistry, National University of Singapore, 3 Science Drive 3, 117543, Singapore

<sup>¶</sup>These authors contributed equally to this work

Corresponding author: Andrew T. S. Wee (Email: [phyweets@nus.edu.sg](mailto:phyweets@nus.edu.sg), Tel: +65 66013757)

### 1. AFM image for the determination of the PEPI thickness

In Figure S1, we show an optical image of the monolayer WS<sub>2</sub>/PEPI van der Waals heterostructure used for optical measurements together with an AFM profile of a portion of this image where only the PEPI layer is present in order to estimate the height of this layer.

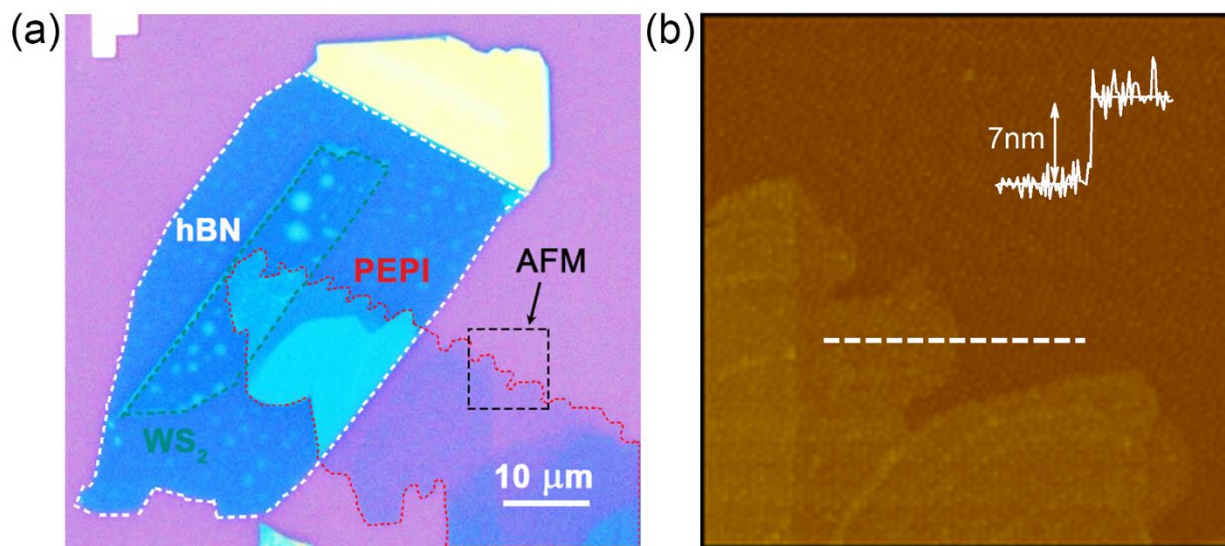

**Figure S1.** (a) Optical microscope image of the monolayer WS<sub>2</sub>/PEPI heterostructure. The black dashed square demarcates the region where an AFM measurement was performed in order to

determine the thickness of the PEPI layer. The optical contrast in this region is similar to the region bordered by the red dashed lines in **Figure 1b** of the main text. (b) AFM image of the area marked in panel (a). The scanning area is  $10\ \mu\text{m} \times 10\ \mu\text{m}$ . A line scan along the white dashed line is shown as an inset and yields an estimate for the PEPI thickness of about 7nm.

## **2. Performance of a parallel device geometry**

Figure S2 shows the device structure and the corresponding optoelectronic device performances of a  $\text{WS}_2/\text{PEPI}$  heterostructure device without separate contacts to each layer. Instead, both layers are contacted in parallel by the source and the drain contact on either side of the device. For this device architecture, the enhancement of the photoresponsivity in the  $\text{WS}_2/\text{PEPI}$  region compared to that in the  $\text{WS}_2$  monolayer region is very small. This parallel connection does not allow for efficient extraction/separation of the photo-generated charge carriers through a built-in or applied electric field at the heterointerface.

In contrast, in the device geometry of Figure 2a, it is possible to generate an additional built-in potential at the heterointerface by applying a bias voltage. This causes a significant improvement in the efficiency for charge separation and extraction. As a result, the photoresponsivity in the  $\text{WS}_2/\text{PEPI}$  heterointerface region is enhanced by nearly a factor of 5 compared to that in the  $\text{WS}_2$  monolayer region.

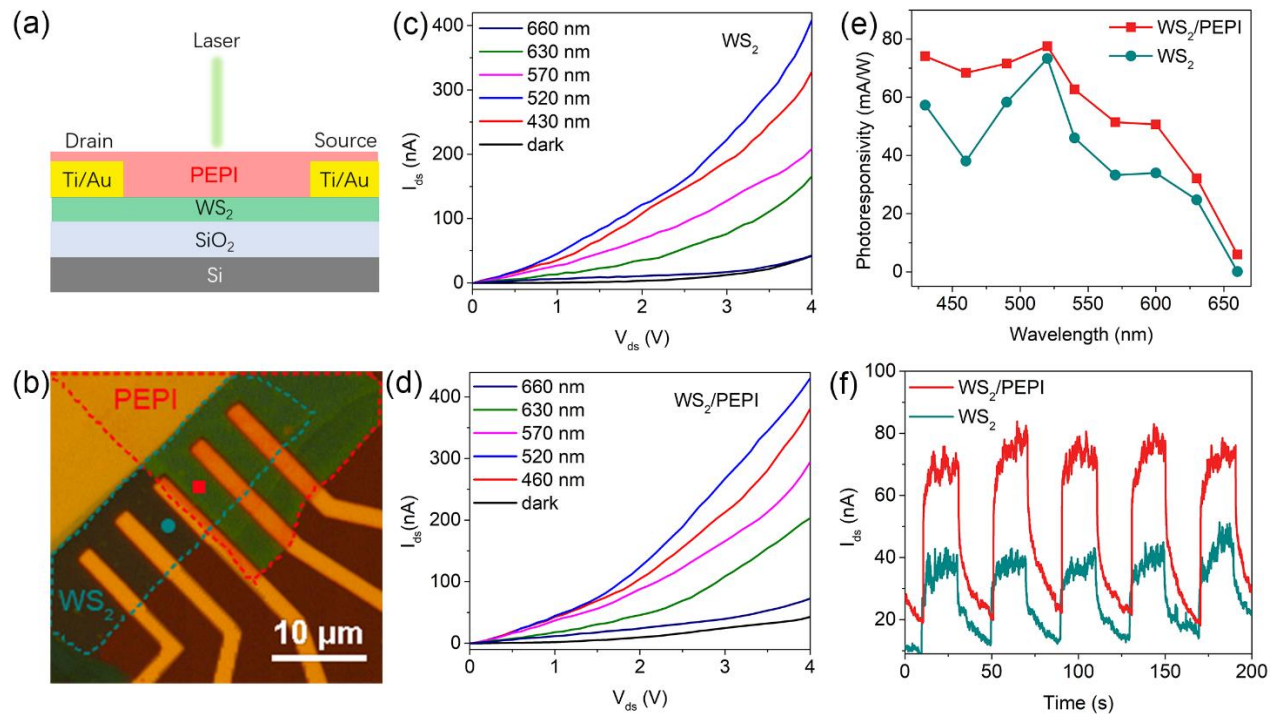

**Figure S2.** Performance of the  $\text{WS}_2/\text{PEPI}$  heterostructure photodetector with both layers contacted in parallel. (a) Schematic device structure of this parallel device structure. (b) Optical microscope image. The red square and the cyan circle mark the approximate location of the laser spot during the optoelectronic measurements. (c,d).  $I_{ds}$ - $V_{ds}$  curves recorded on the  $\text{WS}_2$  monolayer region (c) and the  $\text{WS}_2/\text{PEPI}$  interface region (d) in the dark and for laser illuminations with different wavelengths. The laser power for illumination is  $5 \mu\text{W}$  in each case. The gate voltage  $V_g$  is set to 0 V. (e) A comparison of the photoresponsivity measured on the  $\text{WS}_2$  monolayer region and the  $\text{WS}_2/\text{PEPI}$  heterointerface region for  $V_g = 0$  V and  $V_{ds} = 4$  V. (f) A comparison of  $I_{ds}$  versus *time* photocurrent response for the  $\text{WS}_2$  monolayer area and  $\text{WS}_2/\text{PEPI}$  heterointerface area for 520 nm laser illumination with a power of  $0.7 \mu\text{W}$ . The bias voltage  $V_{ds}$  equals 2 V and the gate voltage  $V_g$  equals 0 V.

### 3. $I_{ds}$ - $V_{ds}$ characteristics of the WS<sub>2</sub>/PEPI heterostructure and WS<sub>2</sub> monolayer at low excitation power

Figure S3 displays  $I_{ds}$ - $V_{ds}$  curves of the WS<sub>2</sub>/PEPI heterostructure recorded for a 532 nm laser illumination with low excitation powers. The corresponding data for the WS<sub>2</sub> monolayer are displayed in Figure S4.

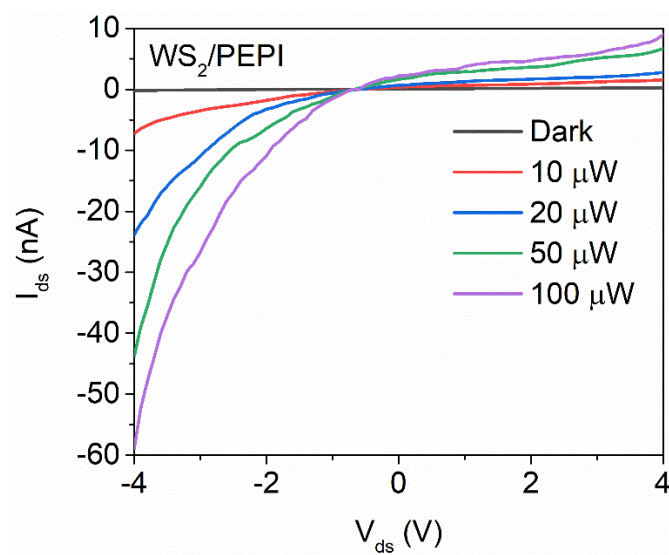

**Figure S3.**  $I_{ds}$ - $V_{ds}$  characteristic for the WS<sub>2</sub>/PEPI heterostructure in the dark and when illuminating the material with a 532 nm laser with laser power ranging from 10  $\mu$ W to 100  $\mu$ W.

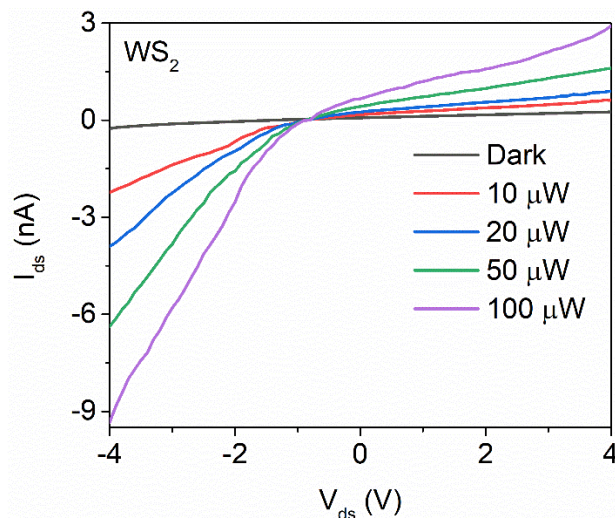

**Figure S4.**  $I_{ds}$ - $V_{ds}$  characteristic for the WS<sub>2</sub> monolayer in the dark and when illuminating the material with a 532 nm laser with laser power ranging from 10  $\mu$ W to 100  $\mu$ W.

#### 4. Current versus time photoresponse

The time dependent current photoresponse for a cyclical excitation for several laser intensities is illustrated in Figure S5 for the WS<sub>2</sub>/PEPI heterostructure and in Figure S6 for the WS<sub>2</sub> monolayer. In both cases the drain to source bias voltage  $V_{ds}$  equals 2 V.

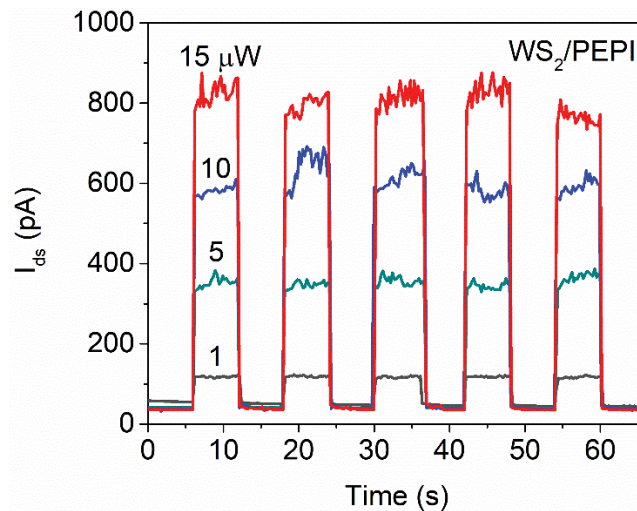

**Figure S5.**  $I_{ds}$ -time photocurrent response when the  $\text{WS}_2/\text{PEPI}$  heterostructure is periodically excited with a 532 nm laser with a power of 1  $\mu\text{W}$  (black), 5  $\mu\text{W}$  (cyan), 10  $\mu\text{W}$  (blue), and 15  $\mu\text{W}$  (red). The bias voltage  $V_{ds}$  is set to 2 V.

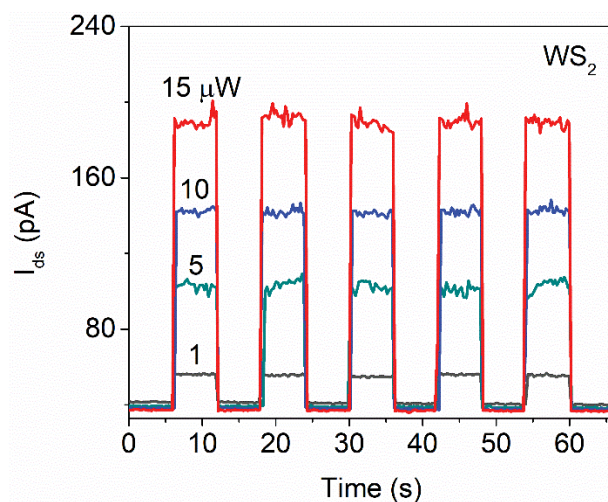

**Figure S6.**  $I_{ds}$ -time photocurrent response for the  $\text{WS}_2$  monolayer for periodic excitation with a 532 nm laser with a power of 1  $\mu\text{W}$  (black), 5  $\mu\text{W}$  (cyan), 10  $\mu\text{W}$  (blue), and 15  $\mu\text{W}$  (red). The bias voltage  $V_{ds}$  is set to 2 V.
